# Supplementary material for: Sex Differences in the Diagnosis, Management, and Outcomes of Suspected Non-ST-Elevation Acute Coronary Syndromes Meeting Rapid Rule-Out Criteria
Source: MDPI journal article supplement (doi:10.3390/jcm12175704), 2023-09-01
Supplement: s1 [file s1]

# **Sex Differences in the Diagnosis, Management, and Outcomes of Suspected Non-ST-Elevation Acute Coronary Syndromes Meeting Rapid Rule-Out Criteria - Supplements**

Ben Cohen , Ruth Tor, Alon Grossman, Ran Kornowski, Avital Porter and David Hasdai

|                                                                                                                                    |          |
|------------------------------------------------------------------------------------------------------------------------------------|----------|
| <b>Cox proportional hazards Model for male vs. female for all patients meeting the rapid rule-out MI criteria .....</b>            | <b>2</b> |
| <b>Cox proportional hazards model for male vs. female for all admitted patients meeting the rapid rule-out MI criteria .....</b>   | <b>3</b> |
| <b>Cox proportional hazards model for male vs. female for all discharged patients meeting the rapid rule-out MI criteria .....</b> | <b>4</b> |

**Cox proportional hazards model for male vs. female for all patients meeting the rapid rule-out MI criteria**

| Parameter         |                | Pr > ChiSq | Hazard Ratio | 95% Hazard Ratio Confidence Limits |       |
|-------------------|----------------|------------|--------------|------------------------------------|-------|
| Sex               | Female         | 0.7398     | 1.047        | 0.797                              | 1.376 |
| age               |                | <.0001     | 1.048        | 1.037                              | 1.060 |
| Decision          | Discharge      | 0.1570     | 1.276        | 0.911                              | 1.787 |
| Hypertension      | Yes            | 0.6233     | 1.100        | 0.752                              | 1.610 |
| Diabetes          | Yes            | 0.0119     | 1.640        | 1.116                              | 2.412 |
| Dyslipidemia      | Yes            | 0.0603     | 0.690        | 0.469                              | 1.016 |
| AF                | Yes            | 0.2351     | 1.398        | 0.804                              | 2.431 |
| Thyroid disease   | Yes            | 0.0144     | 1.943        | 1.142                              | 3.308 |
| Heart failure     | Yes            | 0.1245     | 1.860        | 0.843                              | 4.105 |
| CKD               | Yes            | 0.5003     | 0.672        | 0.211                              | 2.137 |
| IHD               | Yes            | 0.0423     | 1.518        | 1.015                              | 2.270 |
| Smoker            | Yes            | 0.0127     | 1.920        | 1.149                              | 3.208 |
| First cTnT result | >3ng/L-<5ng/L  | 0.0639     | 1.588        | 0.974                              | 2.589 |
| First cTnT result | >=5ng/L-14ng/L | <.0001     | 2.876        | 1.695                              | 4.879 |

AF = atrial fibrillation; CKD = chronic kidney disease; IHD = ischemic heart disease.

# Cox proportional hazards model for male vs. female for all admitted patients meeting the rapid rule-out MI criteria

| Parameter         |                | Pr > ChiSq | Hazard Ratio | 95% Hazard Ratio Confidence Limits |        |
|-------------------|----------------|------------|--------------|------------------------------------|--------|
| Sex               | Female         | 0.8863     | 1.028        | 0.701                              | 1.508  |
| age               |                | <.0001     | 1.036        | 1.019                              | 1.053  |
| Decision          | Yes            | 0.5920     | 1.123        | 0.735                              | 1.715  |
| Hypertension      | Yes            | 0.0647     | 1.508        | 0.975                              | 2.333  |
| Diabetes          | Yes            | 0.0984     | 0.697        | 0.454                              | 1.069  |
| Dyslipidemia      | Yes            | 0.1444     | 1.563        | 0.858                              | 2.847  |
| AF                | Yes            | 0.0477     | 1.875        | 1.006                              | 3.494  |
| Thyroid disease   | Yes            | 0.1692     | 1.838        | 0.772                              | 4.376  |
| Heart failure     | Yes            | 0.2015     | 0.276        | 0.038                              | 1.992  |
| CKD               | Yes            | 0.0684     | 1.514        | 0.969                              | 2.366  |
| IHD               | Yes            | 0.1575     | 1.525        | 0.850                              | 2.737  |
| Smoker            | >3ng/L-<5ng/L  | 0.0665     | 3.084        | 0.926                              | 10.268 |
| First cTnT result | >=5ng/L-14ng/L | 0.0061     | 5.228        | 1.603                              | 17.048 |

AF = atrial fibrillation; CKD = chronic kidney disease; IHD = ischemic heart disease.

# Cox proportional hazards model for male vs. female for all discharged patients meeting the rapid rule-out MI criteria

| Parameter         |                | Pr > ChiSq | Hazard Ratio | 95% Hazard Ratio Confidence Limits |        |
|-------------------|----------------|------------|--------------|------------------------------------|--------|
| Sex               | Female         | 0.1614     | 1.396        | 0.875                              | 2.227  |
| age               |                | <.0001     | 1.064        | 1.045                              | 1.083  |
| Decision          | Yes            | 0.8742     | 1.077        | 0.429                              | 2.702  |
| Hypertension      | Yes            | 0.0715     | 2.280        | 0.930                              | 5.588  |
| Diabetes          | Yes            | 0.2952     | 0.612        | 0.244                              | 1.535  |
| Dyslipidemia      | Yes            | 0.6181     | 0.673        | 0.142                              | 3.196  |
| AF                | Yes            | 0.0584     | 2.780        | 0.964                              | 8.017  |
| Thyroid disease   | Yes            | 0.2503     | 3.507        | 0.413                              | 29.793 |
| Heart failure     | Yes            | 0.1787     | 2.913        | 0.613                              | 13.844 |
| CKD               | Yes            | 0.6450     | 1.273        | 0.456                              | 3.559  |
| IHD               | Yes            | 0.0402     | 3.124        | 1.052                              | 9.276  |
| Smoker            | >3ng/L-<5ng/L  | 0.5892     | 1.168        | 0.665                              | 2.050  |
| First cTnT result | >=5ng/L-14ng/L | 0.0776     | 1.902        | 0.931                              | 3.883  |

AF = atrial fibrillation; CKD = chronic kidney disease; IHD = ischemic heart disease.
